# Supplementary figures and images for: Interactions between cortisol and Rhesus glycoprotein expression in ureogenic toadfish, Opsanus beta
Source: Oxford University Press journal article supplement (doi:10.1242/jeb.061895), 2011-12-21

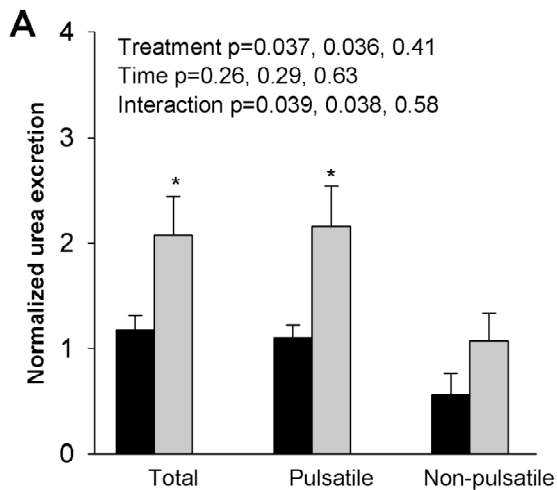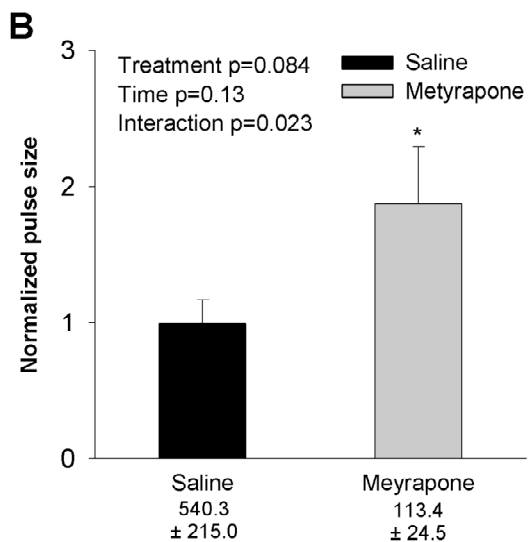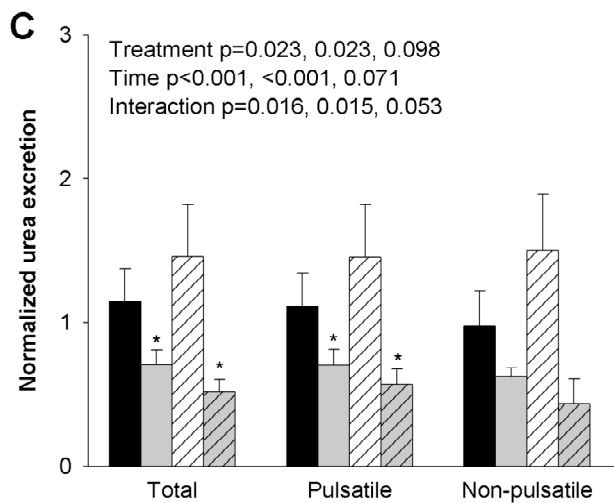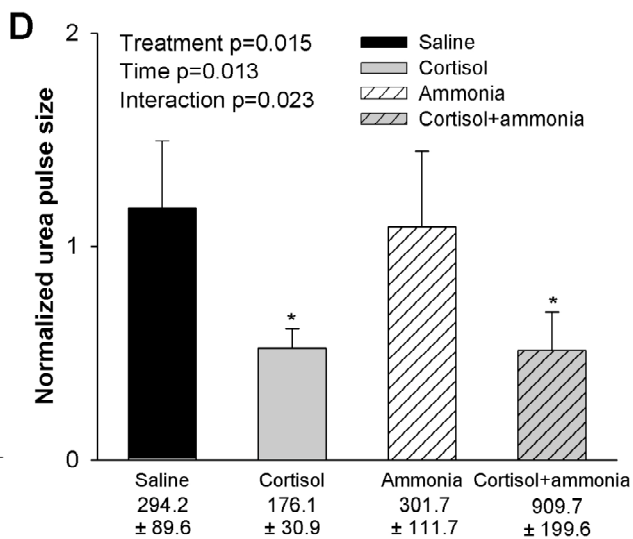

Supplement: jeb061895figs1.pdf [file jeb061895figs1.pdf]

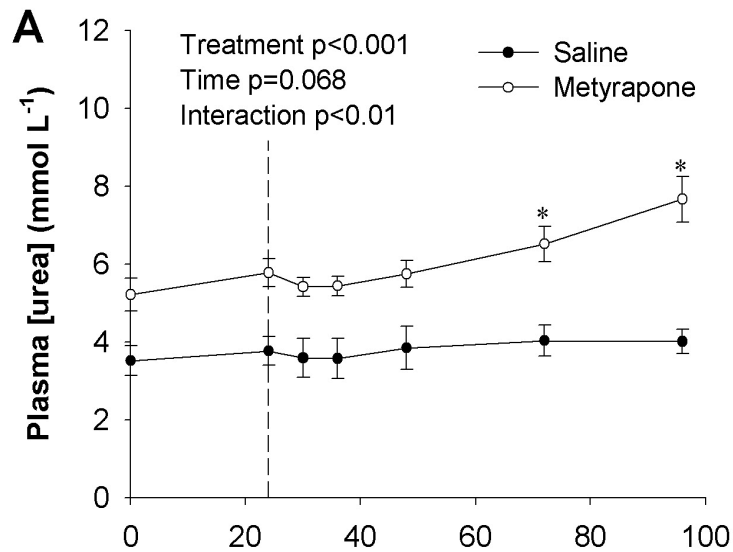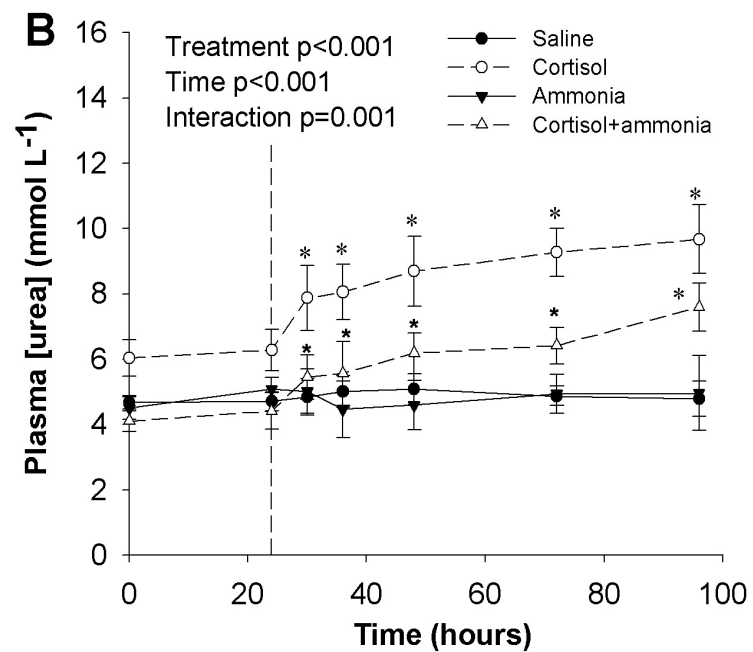

Supplement: jeb061895figs2.pdf [file jeb061895figs2.pdf]
